# Supplementary material
Source: publisher site journal article supplement (https://oneecosystem.pensoft.net/article/download/suppl/7725275/)
Supplement: Supplementary file 1

**ANNEX A Curve Number values attributed to soil groups for each class of CLC**

landcover | hydrological_soils_group | curve_number

| landcover:ArableLand | | | hydrology:SoilGroupA | | | 67 | . |
| --- | --- | --- | --- | --- | --- |
| landcover:ArableLand | | | hydrology:SoilGroupB | | | 78 | . |
| landcover:ArableLand | | | hydrology:SoilGroupC | | | 85 | . |
| landcover:ArableLand | | | hydrology:SoilGroupD | | | 89 | . |
| landcover:ArableLand | | | # | | | 82 | . |
| landcover:PermanentCropland | | | hydrology:SoilGroupA | | | 67 | . |
| landcover:PermanentCropland | | | hydrology:SoilGroupB | | | 78 | . |
| landcover:PermanentCropland | | | hydrology:SoilGroupC | | | 85 | . |
| landcover:PermanentCropland | | | hydrology:SoilGroupD | | | 89 | . |
| landcover:PermanentCropland | | | # | | | 82 | . |
| landcover:HeterogeneousAgriculturalLand | | | hydrology:SoilGroupA | | | 52 | . |
| landcover:HeterogeneousAgriculturalLand | | | hydrology:SoilGroupB | | | 69 | . |
| landcover:HeterogeneousAgriculturalLand | | | hydrology:SoilGroupC | | | 79 | . |
| landcover:HeterogeneousAgriculturalLand | | | hydrology:SoilGroupD | | | 84 | . |
| landcover:HeterogeneousAgriculturalLand | | | # | | | 74 | . |
| landcover:EvergreenBroadleafForest | | | hydrology:SoilGroupA | | | 30 | . |
| landcover:EvergreenBroadleafForest | | | hydrology:SoilGroupB | | | 58 | . |
| landcover:EvergreenBroadleafForest | | | hydrology:SoilGroupC | | | 71 | . |
| landcover:EvergreenBroadleafForest | | | hydrology:SoilGroupD | | | 77 | . |
| landcover:EvergreenBroadleafForest | | | # | | | 65 | . |
| landcover:DeciduousBroadleafForest | | | hydrology:SoilGroupA | | | 42 | . |
| landcover:DeciduousBroadleafForest | | | hydrology:SoilGroupB | | | 66 | . |
| landcover:DeciduousBroadleafForest | | | hydrology:SoilGroupC | | | 79 | . |
| landcover:DeciduousBroadleafForest | | | hydrology:SoilGroupD | | | 85 | . |
| landcover:DeciduousBroadleafForest | | | # | | | 73 | . |
| landcover:EvergreenConiferousForest | | | hydrology:SoilGroupA | | | 34 | . |
| landcover:EvergreenConiferousForest | | | hydrology:SoilGroupB | | | 60 | . |
| landcover:EvergreenConiferousForest | | | hydrology:SoilGroupC | | | 73 | . |
| landcover:EvergreenConiferousForest | | | hydrology:SoilGroupD | | | 79 | . |
| landcover:EvergreenConiferousForest | | | # | | | 67 | . |
| landcover:DeciduousConiferousForest | | | hydrology:SoilGroupA | | | 40 | . |
| landcover:DeciduousConiferousForest | | | hydrology:SoilGroupB | | | 64 | . |
| landcover:DeciduousConiferousForest | | | hydrology:SoilGroupC | | | 77 | . |
| landcover:DeciduousConiferousForest | | | hydrology:SoilGroupD | | | 83 | . |
| landcover:DeciduousConiferousForest | | | # | | | 71 | . |
| landcover:MixedForest | | | hydrology:SoilGroupA | | | 38 | . |
| landcover:MixedForest | | | hydrology:SoilGroupB | | | 62 | . |
| landcover:MixedForest | | | hydrology:SoilGroupC | | | 75 | . |
| landcover:MixedForest | | | hydrology:SoilGroupD | | | 81 | . |
| landcover:MixedForest | | | # | | | 69 | . |
| landcover:ClosedSavanna | | | hydrology:SoilGroupA | | | 61 | . |
| landcover:ClosedSavanna | | | hydrology:SoilGroupB | | | 71 | . |
| landcover:ClosedSavanna | | | hydrology:SoilGroupC | | | 81 | . |
| landcover:ClosedSavanna | | | hydrology:SoilGroupD | | | 89 | . |
| landcover:ClosedSavanna | | | # | | | 76 | . |
| landcover:OpenSavanna | | | hydrology:SoilGroupA | | | 72 | . |
| landcover:OpenSavanna | | | hydrology:SoilGroupB | | | 80 | . |
| landcover:OpenSavanna | | | hydrology:SoilGroupC | | | 87 | . |
| landcover:OpenSavanna | | | hydrology:SoilGroupD | | | 93 | . |
| landcover:OpenSavanna | | | # | | | 84 | . |
| landcover:Shrubland | | | hydrology:SoilGroupA | | | 45 | . |
| landcover:Shrubland | | | hydrology:SoilGroupB | | | 65 | . |
| landcover:Shrubland | | | hydrology:SoilGroupC | | | 75 | . |
| landcover:Shrubland | | | hydrology:SoilGroupD | | | 80 | . |
| landcover:Shrubland | | | # | | | 70 | . |
| landcover:TransitionalWoodlandScrub | | | hydrology:SoilGroupA | | | 45 | . |
| landcover:TransitionalWoodlandScrub | | | hydrology:SoilGroupB | | | 65 | . |
| landcover:TransitionalWoodlandScrub | | | hydrology:SoilGroupC | | | 75 | . |

| landcover:TransitionalWoodlandScrub | | | hydrology:SoilGroupD | | | 80 | . |
| --- | --- | --- | --- | --- | --- |
| landcover:TransitionalWoodlandScrub | | | # | | | 70 | . |
| landcover:AgriculturalVegetation | | | hydrology:SoilGroupA | | | 67 | . |
| landcover:AgriculturalVegetation | | | hydrology:SoilGroupB | | | 78 | . |
| landcover:AgriculturalVegetation | | | hydrology:SoilGroupC | | | 85 | . |
| landcover:AgriculturalVegetation | | | hydrology:SoilGroupD | | | 89 | . |
| landcover:AgriculturalVegetation | | | # | | | 82 | . |
| landcover:Forest | | | hydrology:SoilGroupA | | | 38 | . |
| landcover:Forest | | | hydrology:SoilGroupB | | | 62 | . |
| landcover:Forest | | | hydrology:SoilGroupC | | | 75 | . |
| landcover:Forest | | | hydrology:SoilGroupD | | | 81 | . |
| landcover:Forest | | | # | | | 69 | . |
| landcover:Grassland | | | hydrology:SoilGroupA | | | 49 | . |
| landcover:Grassland | | | hydrology:SoilGroupB | | | 69 | . |
| landcover:Grassland | | | hydrology:SoilGroupC | | | 79 | . |
| landcover:Grassland | | | hydrology:SoilGroupD | | | 84 | . |
| landcover:Grassland | | | # | | | 74 | . |
| landcover:Wetland | | | hydrology:SoilGroupA | | | 30 | . |
| landcover:Wetland | | | hydrology:SoilGroupB | | | 58 | . |
| landcover:Wetland | | | hydrology:SoilGroupC | | | 71 | . |
| landcover:Wetland | | | hydrology:SoilGroupD | | | 78 | . |
| landcover:Wetland | | | # | | | 65 | . |
| landcover:ArtificialSurface | | | hydrology:SoilGroupA | | | 80 | . |
| landcover:ArtificialSurface | | | hydrology:SoilGroupB | | | 85 | . |
| landcover:ArtificialSurface | | | hydrology:SoilGroupC | | | 90 | . |
| landcover:ArtificialSurface | | | hydrology:SoilGroupD | | | 95 | . |
| landcover:ArtificialSurface | | | # | | | 87 | . |
| landcover:WaterBody | | | # | | | 98 | . |
| landcover:GlacierAndPerpetualSnow | | | # | | | 40 | . |
| landcover:BareArea | | | hydrology:SoilGroupA | | | 72 | . |
| landcover:BareArea | | | hydrology:SoilGroupB | | | 82 | . |
| landcover:BareArea | | | hydrology:SoilGroupC | | | 83 | . |
| landcover:BareArea | | | hydrology:SoilGroupD | | | 87 | . |
| landcover:BareArea | | | # | | | 83 | . |
| landcover:BurnedLand | | | hydrology:SoilGroupA | | | 72 | . |
| landcover:BurnedLand | | | hydrology:SoilGroupB | | | 82 | . |
| landcover:BurnedLand | | | hydrology:SoilGroupC | | | 83 | . |
| landcover:BurnedLand | | | hydrology:SoilGroupD | | | 87 | . |
| landcover:BurnedLand | | | # | | | 83 | . |
| landcover:LichenMoss | | | hydrology:SoilGroupA | | | 72 | . |
| landcover:LichenMoss | | | hydrology:SoilGroupB | | | 82 | . |
| landcover:LichenMoss | | | hydrology:SoilGroupC | | | 83 | . |
| landcover:LichenMoss | | | hydrology:SoilGroupD | | | 87 | . |
| landcover:LichenMoss | | | # | | | 83 | . |
| landcover:SparseVegetation | | | hydrology:SoilGroupA | | | 72 | . |
| landcover:SparseVegetation | | | hydrology:SoilGroupB | | | 82 | . |
| landcover:SparseVegetation | | | hydrology:SoilGroupC | | | 83 | . |
| landcover:SparseVegetation | | | hydrology:SoilGroupD | | | 87 | . |
